# Supplementary material for: Electronic structure, stability, and aromaticity of M2B6 (M = Mg, Ca, Sr, and Ba): an interplay between spin pairing and electron delocalization
Source: Royal Society of Chemistry journal article supplement (doi:10.1039/d1cp04791d), 2022-01-01
Supplement: d1cp04791d1.pdf [file d1cp04791d1.pdf]

## Electronic Supplementary Information

**Electronic structure, stability, and aromaticity of  $M_2B_6$  ( $M = Mg, Ca, Sr$ , and  $Ba$ ). An interplay between spin pairing and electron delocalization**

Sladana Đorđević, Slavko Radenković\*

*University of Kragujevac, Faculty of Science, P. O. Box 60, 34000 Kragujevac, Serbia*

\*Corresponding author: [slavkoradenkovic@kg.ac.rs](mailto:slavkoradenkovic@kg.ac.rs)

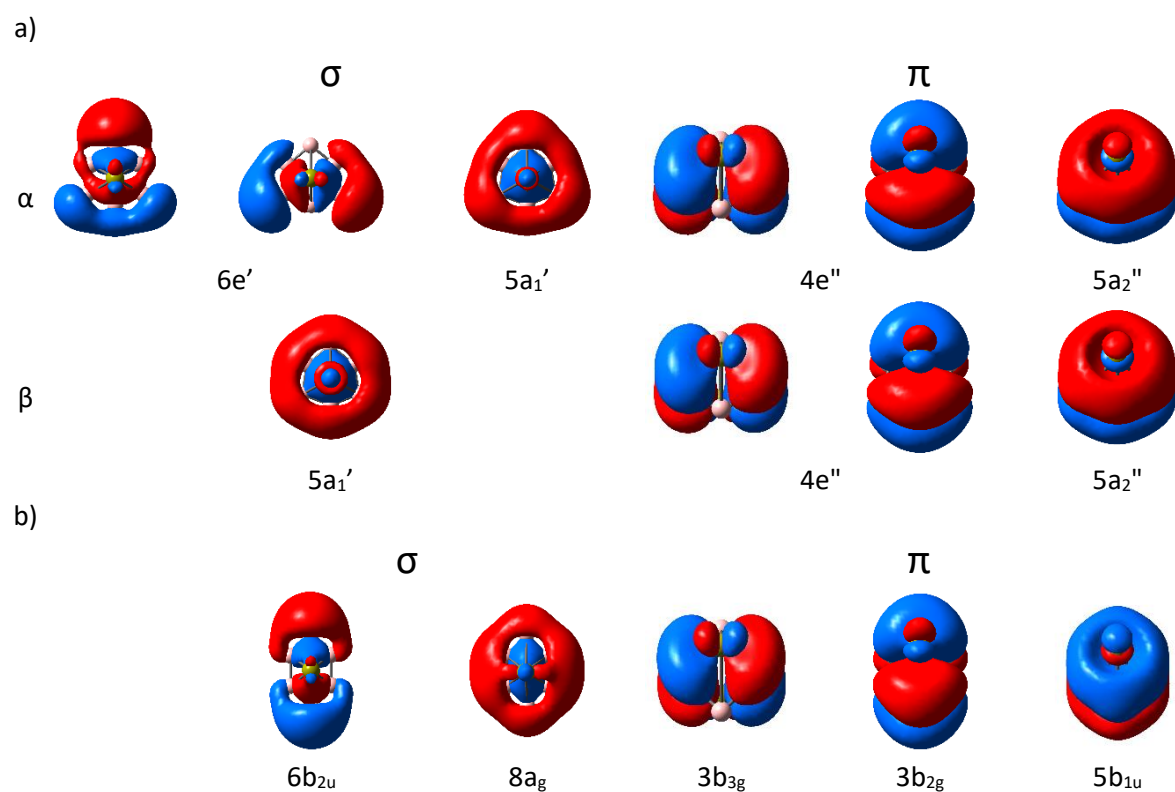

**Figure S1.** a)  $\sigma$  and  $\pi$  occupied canonical molecular spin ( $\alpha$  and  $\beta$ ) orbitals for T-Ca<sub>2</sub>B<sub>6</sub> obtained at the UB3LYP/def2-TZVP level; b)  $\sigma$  and  $\pi$  occupied canonical molecular orbitals for S-Ca<sub>2</sub>B<sub>6</sub> obtained at the RB3LYP/def2-TZVP.

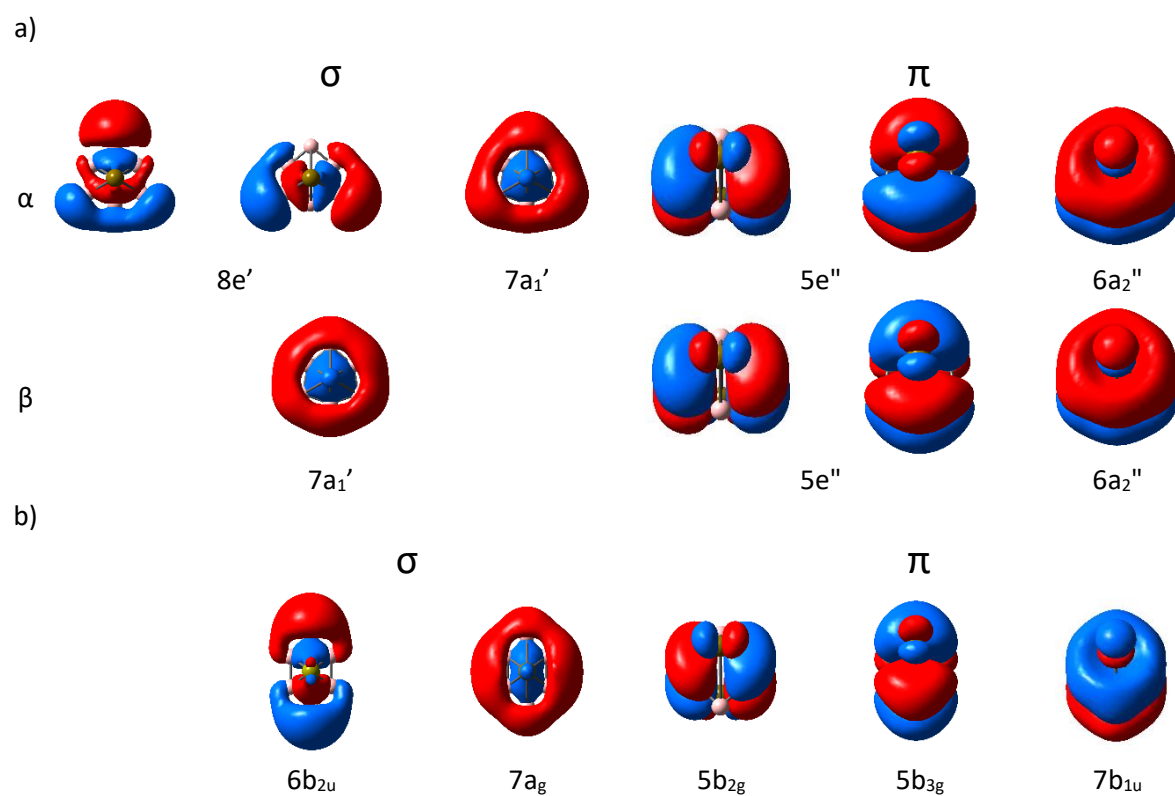

**Figure S2.** a)  $\sigma$  and  $\pi$  occupied canonical molecular spin ( $\alpha$  and  $\beta$ ) orbitals for T-Sr<sub>2</sub>B<sub>6</sub> obtained at the UB3LYP/def2-TZVP level; b)  $\sigma$  and  $\pi$  occupied canonical molecular orbitals for S-Sr<sub>2</sub>B<sub>6</sub> obtained at the RB3LYP/def2-TZVP.

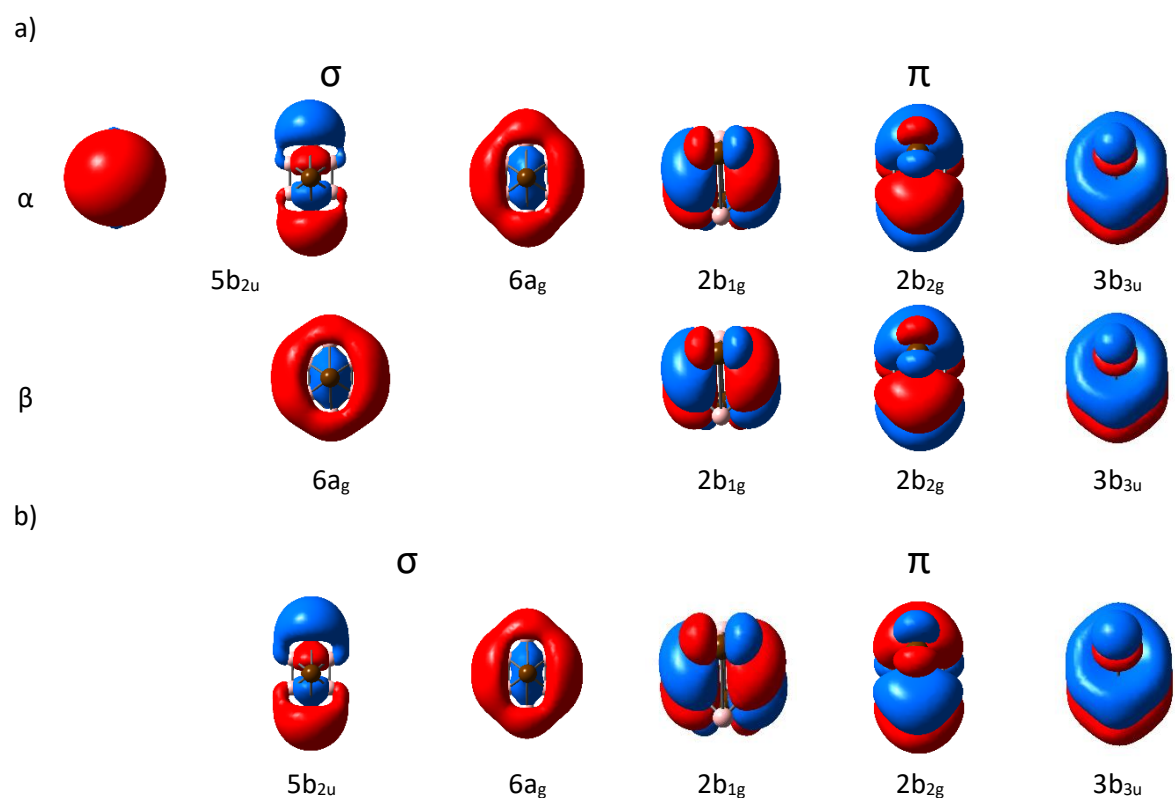

**Figure S3.** a)  $\sigma$  and  $\pi$  occupied canonical molecular spin ( $\alpha$  and  $\beta$ ) orbitals for T-Ba<sub>2</sub>B<sub>6</sub> obtained at the UB3LYP/def2-TZVP level; b)  $\sigma$  and  $\pi$  occupied canonical molecular orbitals for S-Ba<sub>2</sub>B<sub>6</sub> obtained at the RB3LYP/def2-TZVP.

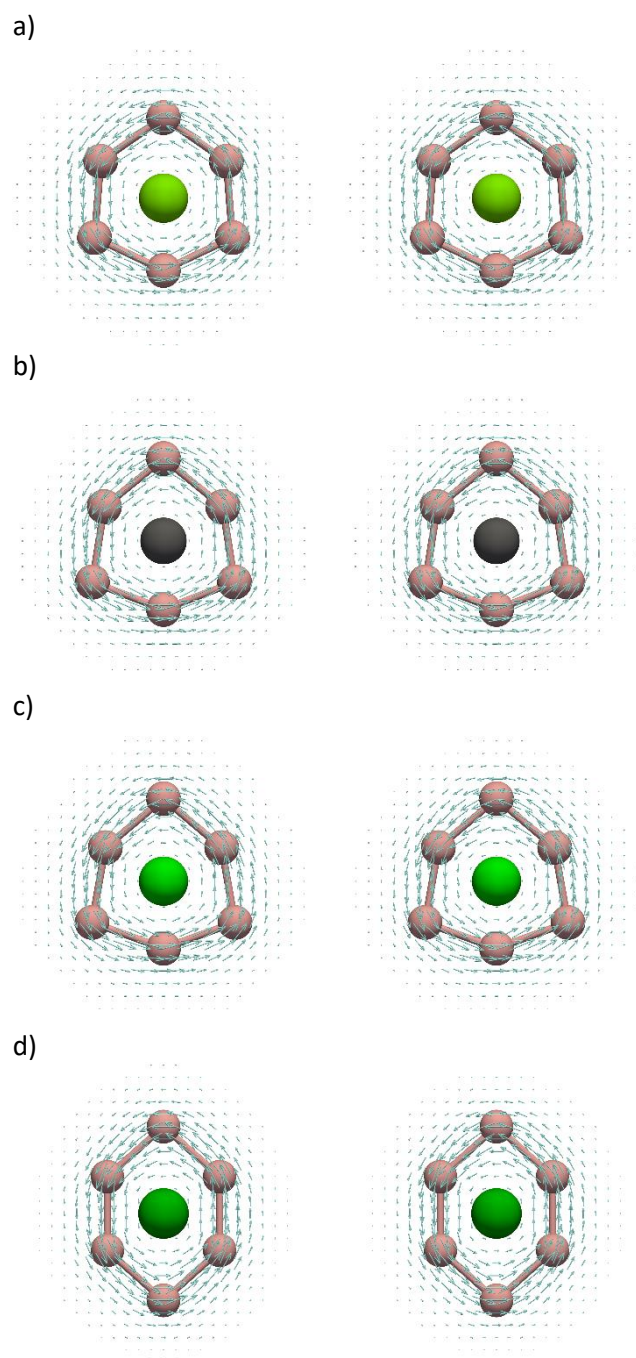

**Figure S4.**  $\alpha$  (left) and  $\beta$  (right)  $\pi$  electron current density maps of the  $\text{Mg}_2\text{B}_6$  (a),  $\text{Ca}_2\text{B}_6$  (b),  $\text{Sr}_2\text{B}_6$  (c) and  $\text{Ba}_2\text{B}_6$  (d) calculated 1 bohr above the boron ring planes.

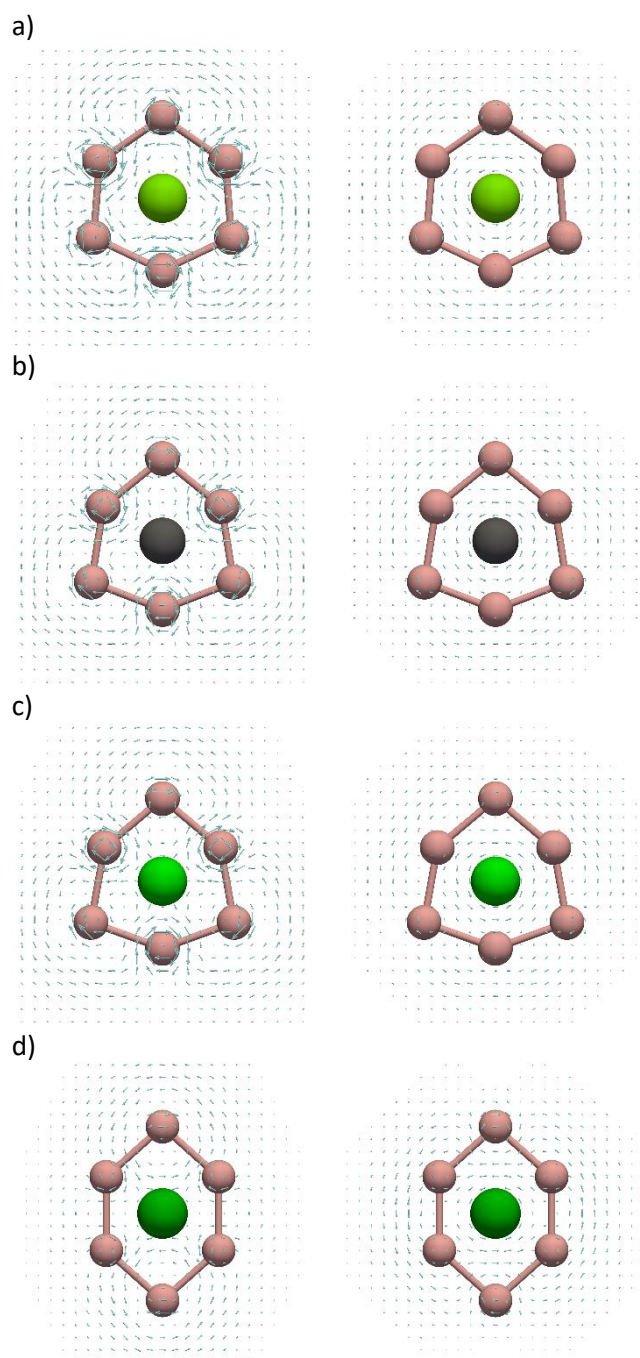

**Figure S5.**  $\alpha$  (left) and  $\beta$  (right)  $\sigma$  electron current density maps of the  $\text{Mg}_2\text{B}_6$  (a),  $\text{Ca}_2\text{B}_6$  (b),  $\text{Sr}_2\text{B}_6$  (c) and  $\text{Ba}_2\text{B}_6$  (d) calculated 1 bohr above the boron ring planes.

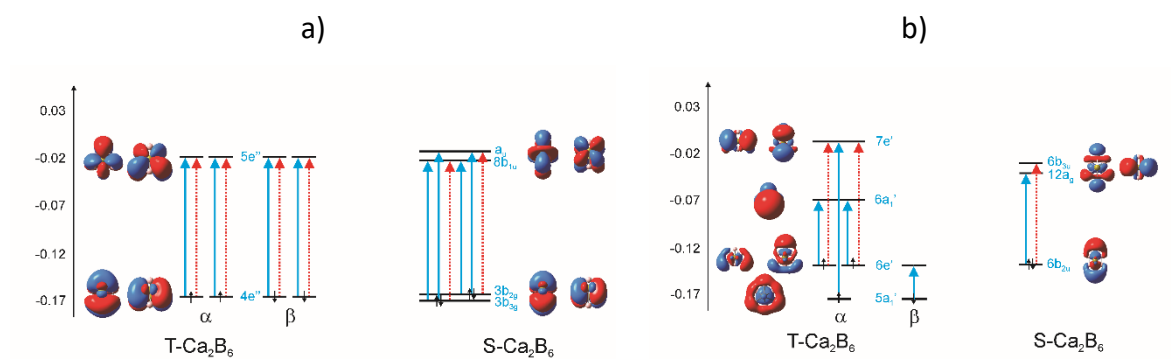

**Figure S6.**  $\pi$  (a) and  $\sigma$  (b) frontier orbital energy levels (in au) of  $\text{Ca}_2\text{B}_6$  obtained at the B3LYP/def2-TZVP level of theory. Full (blue) arrows represent the main translational transitions, and dashed (red) arrows represent the main rotational transitions.

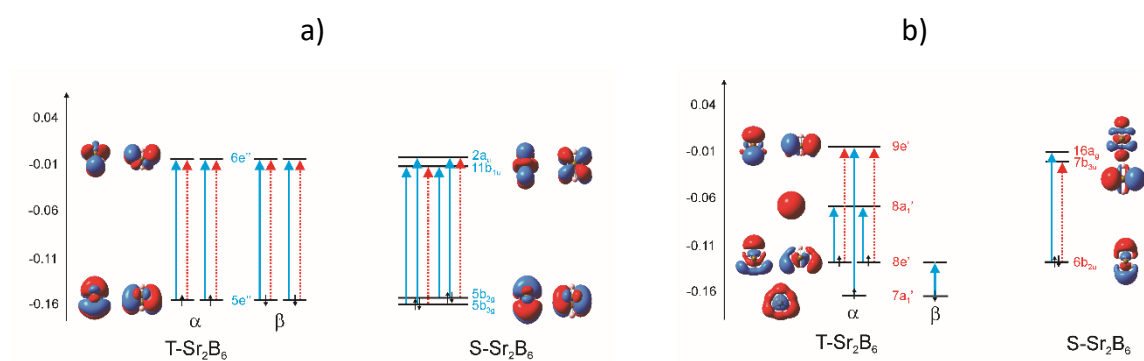

**Figure S7.**  $\pi$  (a) and  $\sigma$  (b) frontier orbital energy levels (in au) of  $\text{Sr}_2\text{B}_6$  obtained at the B3LYP/def2-TZVP level of theory. Full (blue) arrows represent the main translational transitions, and dashed (red) arrows represent the main rotational transitions.



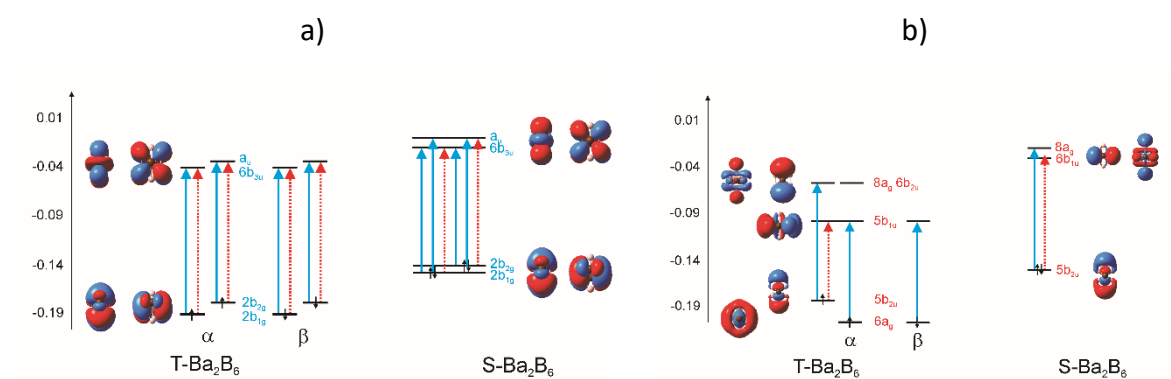

**Figure S8.**  $\pi$  (a) and  $\sigma$  (b) frontier orbital energy levels (in au) of  $\text{Ba}_2\text{B}_6$  obtained at the B3LYP/def2-TZVP level of theory. Full (blue) arrows represent the main translational transitions, and dashed (red) arrows represent the main rotational transitions.
